# Supplementary material for: SARS-CoV-2 spike glycoprotein vaccine candidate NVX-CoV2373 immunogenicity in baboons and protection in mice
Source: Nat Commun. 2021 Jan 14;12:372. doi: 10.1038/s41467-020-20653-8 (PMC7809486; doi:10.1038/s41467-020-20653-8)
Supplement: Supplementary file 1 — Supplementary Information [file 41467_2020_20653_MOESM1_ESM.pdf]

**Supplementary Information for:**

**SARS-CoV-2 spike glycoprotein vaccine candidate NVX-CoV2373 immunogenicity  
in baboons and protection in mice**

Jing-Hui Tian<sup>1</sup> #, Nita Patel<sup>1</sup> #, Robert Haupt<sup>2</sup> #, Haixia Zhou<sup>1</sup>, Stuart Weston<sup>2</sup>, Holly Hammond<sup>2</sup>, James Logue<sup>2</sup>, Alyse D. Portnoff<sup>1</sup>, James Norton<sup>1</sup>, Mimi Guebre-Xabier<sup>1</sup>, Bin Zhou<sup>1</sup>, Kelsey Jacobson<sup>1</sup>, Sonia Maciejewski<sup>1</sup>, Rafia Khatoon<sup>1</sup>, Malgorzata Wisniewska<sup>1</sup>, Will Moffitt<sup>1</sup>, Stefanie Kluepfel-Stahl<sup>1</sup>, Betty Ekechukwu<sup>1</sup>, James Papin<sup>3</sup>, Sarathi Boddapati<sup>4</sup>, C. Jason Wong<sup>4</sup>, Pedro A. Piedra<sup>5</sup>, Matthew B. Frieman<sup>2</sup>, Michael J. Massare<sup>1</sup>, Louis Fries<sup>1</sup>, Karin Lövgren Bengtsson<sup>6</sup>, Linda Stertman<sup>6</sup>, Larry Ellingsworth<sup>1</sup>, Gregory Glenn<sup>1</sup>, and Gale Smith<sup>1</sup> \*

<sup>1</sup>Novavax, Inc. 21 Firstfield Road, Gaithersburg, MD, 20878, USA.

<sup>2</sup>University of Maryland, School of Medicine, 685 West Baltimore St, Baltimore, MD 21201, USA.

<sup>3</sup>University of Oklahoma, Health Sciences Center, Department of Pathology, Division of Comparative Medicine, 940 Stanton L. Young, BMS 203, Oklahoma City, OK, 73104 USA.

<sup>4</sup>Catalent Cell & Gene Therapy, 20 Firstfield Road, Gaithersburg, MD, 20874, USA.

<sup>5</sup>Department of Molecular Virology and Microbiology, and Pediatrics, Baylor College of Medicine, Houston, Texas.

<sup>6</sup>Novavax AB, Kungsgatan 109, Uppsala, SE-753 18, SE.

#These authors contributed equally.

\*Correspondence: [GSmith@Novavax.com](mailto:GSmith@Novavax.com).

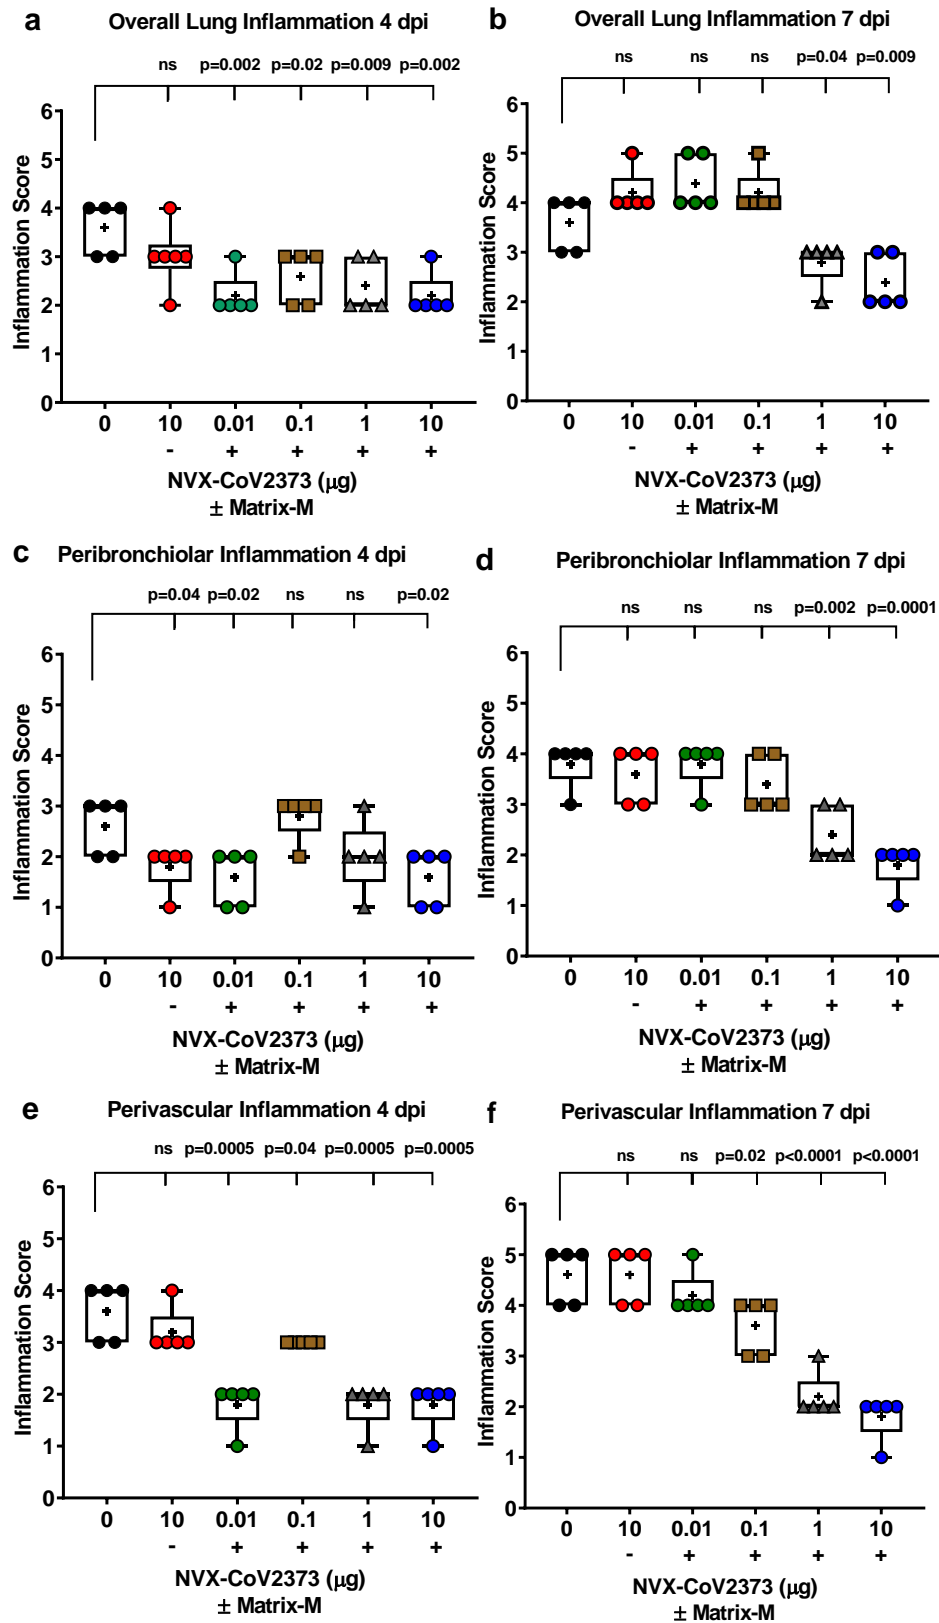

**Supplementary Figure 1. Histopathology scores of NVX-CoV2373 immunized mice challenged with SARS-CoV-2.** Groups of mice (N = 10/group) were immunized twice (day 0 and 14) with NVX-CoV2373 with or without Matrix-M (5 µg). The placebo group received formulation buffer. Following vaccination, mice were made permissive to SARS-CoV-2 infection by intranasal (IN) transduction with  $2.5 \times 10^8$  pfu Ad/hACE2, 38 days after immunization. At four days post transduction, mice were challenged intranasal with  $1.5 \times 10^5$  pfu of SARS-CoV-2. Five mice from each group were sacrificed at 4 days (**a**, **c**, and **e**) and 7 days (**b**, **d**, and **f**) post infection (dpi). Lung tissues were collected, fixed, paraffin embedded and sections stained with hematoxylin and eosin. Sections were scored on a severity scale of 0-5. In the box-and-whisker plots, the mean is indicated by plus, the top and bottom of the box is the 25<sup>th</sup> and 75<sup>th</sup> percentile, and the whiskers the minima and maxima range. Symbols represent individual animal scores. Student's t-test (unpaired, two tail) was used to compare significant differences in vaccinated groups compared to the placebo group. Not significant (ns).

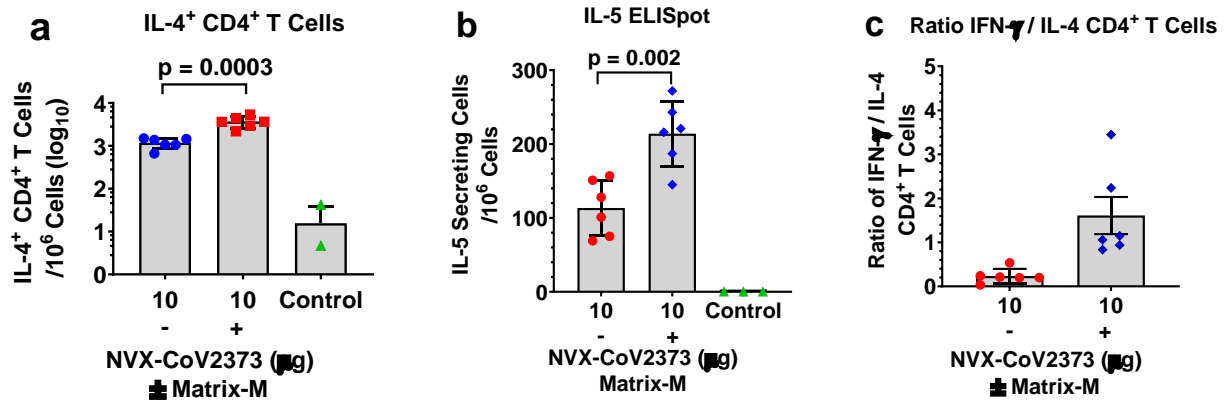

**Supplementary Figure 2. Intracellular staining (ICCS) and ELISpot detection of type 2 cytokines in immunized mice.** Groups of mice (n = 6/group) were immunized with NVX-CoV2373 with and without 5 μg Matrix-M adjuvant with 2 doses spaced 21 days apart and splenocytes collected 7-days after the second immunization and stimulated with NVX-CoV2373 protein. **(A)** ICCS of IL-4<sup>+</sup> CD4<sup>+</sup> T cells. **(B)** IL-5-secreting splenocytes determined by ELISpot analysis. **(C)** Ratio of antigen-specific IFN-γ to IL-4<sup>+</sup> CD4<sup>+</sup> T cells in spleens of mice immunized with NVX-CoV2373 with and without Matrix-M adjuvant. The mean is indicated by bars and error bars indicate the ±SD and individual animal values are indicated by the colored symbols. Student's t-test (unpaired, two tail) was used to determine significant differences between groups receiving the adjuvanted NVX-CoV2373 compared to animals receiving the non-adjuvanted vaccine.

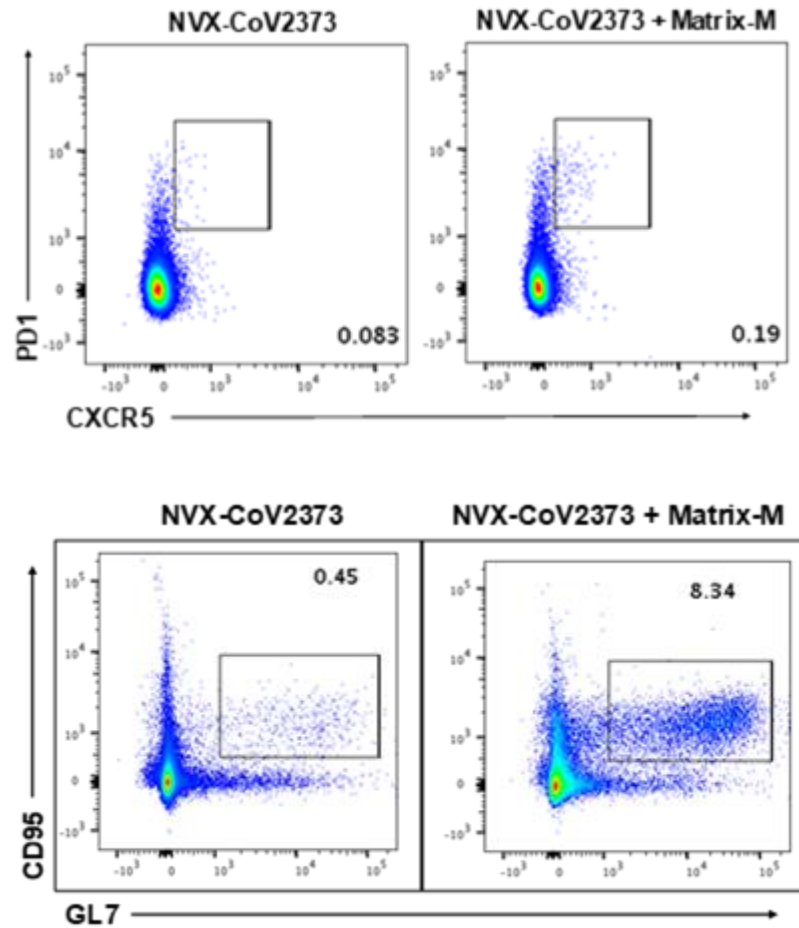

**Supplementary Figure 3. Gating strategy used to determine frequencies of follicular helper T cells (Tfh) and germinal center B cells (GC) generated by immunization with NVX-CoV2373 and Matrix-M adjuvant in mice.** Stimulated cells were stained and analyzed by flow cytometry. The samples were gated to identify single live cells.
